# Supplementary material
Source: publisher site journal article supplement (https://www.dovepress.com/article/303860)
Supplement: Supplementary file 1 [file get_supplementary_file.php]

**Supplementary materials**

**Supplementary Table S1: Phenotypic evaluation of potential transmission dynamics of ESBL-producing Gram-negative bacteria among index patients and neighbouring patients**

| **Pair** | **Participant’s category** | **Participant’s code** | **Bacteria** | **TE** | **TMP-SXT** | **CHLO** | **GEN** | **CIP** | **TZP** | **AMK** | **MER** | **Comments** |
| --- | --- | --- | --- | --- | --- | --- | --- | --- | --- | --- | --- | --- |
| Pair 1  (Ward E8) | Index | AMR-TZ-002 | *E. coli* | S | S | S | S | S | S | S | S | Same species but different strains |
| Neighbour 1 | AMR-TZ-003 | *E. coli* | I | R | S | S | S | S | S | S |
| Neighbour 2 | AMR-TZ-005 | *E. coli* | R | R | R | R | R | I | S | S |
| Pair 2  (Ward E8) | Index | AMR-TZ-010 | *Acinetobacter spp* | S | R | R | R | R | S | S | S | Same species but different strains |
| Neighbour | AMR-TZ-012 | *Acinetobacter spp* | S | R | R | S | S | I | S | R |
| *E.coli* | R | R | S | S | R | S | S | S | Different species |
| Pair 3  (Ward E8) | Index | AMR-TZ-007 | E.coli | R | R | S | S | R | S | S | S | Different species |
| UGNB | R | R | R | R | R | S | S | S |
| Neighbour | AMR-TZ-014 | *Acinetobacter spp* | S | R | R | R | R | R | S | R |
| *K. oxytoca* | R | R | S | S | R | S | S | S |
| Pair 4  (Ward J5) | Index | AMR-TZ-023 | *K. pneumoniae* | R | R | S | S | I | S | S | S | Different species |
| Neighbour | AMR-TZ-021 | *E. coli* | R | R | S | R | R | S | S | S |
| Pair 5  (Ward J5) | Index | AMR-TZ-031 | *E. coli* | R | R | R | I | S | S | S | S | Same species but different strains |
| Neighbour | AMR-TZ-033 | *E. coli* | R | R | R | S | S | I | S | S |
| Neighbour | AMR-TZ-034 | *E.coli* | R | R | R | S | R | R | S | S |
| Pair 6  (Ward J5) | Index | AMR-TZ-037 | *K. pneumoniae* | R | R | S | R | S | I | S | S | Different species |
| Neighbour | AMR-TZ-044 | *E. coli* | R | R | S | S | R | S | S | S |
| Pair 7  (Ward E8) | Index | AMR-TZ-055 | *E.coli* | R | R | S | R | R | R | S | S | Same species but different strains |
| Neighbour | AMR-TZ-057 | *E. coli* | R | R | S | S | R | I | S | S |
| Pair 8  (Ward J5) | Index | AMR-TZ-097 | *M. morganii* | S | R | S | S | S | S | S | S | Different species |
| Neighbour | AMR-TZ-101 | *E. coli* | S | S | S | S | S | S | S | S |
| Pair 9  (Ward J5) | Index | AMR-TZ-118 | *E. coli* | R | R | S | S | S | S | S | S | Same species but different strains; but for neighbours both are similar strains |
| Neighbour | AMR-TZ-127 | *E. coli* | R | R | S | S | R | S | S | S |
| Neighbour | AMR-TZ-128 | E. coli | R | I | S | S | R | S | S | S |
| Pair 10  (Ward E8) | Index | AMR-TZ-228 | *E. coli* | R | R | S | R | R | I | S | S | Different species |
| Neighbour | AMR-TZ-223 | *K. pneumoniae* | S | R | R | R | R | R | S | S |
| Pair 11  (Ward E8) | Index | AMR-TZ-231 | E.coli | R | R | S | S | S | I | S | S | Different species |
| Neighbour | AMR-TZ-245 | UGNB | R | R | S | S | R | S | S | S |

ESBL: Extended-spectrum beta-lactamases; TE: Tetracycline; TMP-SXT: Trimethoprim-sulfamethoxazole; CHLO: Chloramphenicol; GEN: Gentamicin; CIP: Ciprofloxacin; TZP: Piperacillin-tazobactam; MER: Meropenem; UGNB: Unidentified Gram Negative Bacteria; S: Sensitive; I: Intermediate: S: Sensitive

**Supplementary Table S2: Phenotypic evaluation of potential transmission dynamics of ESBL producing Gram negative bacteria among index patients and care takers**

| **Pair** | **Participants’ category** | **Participants’ code** | **ESBL isolate** | **TE** | **TMP-SXT** | **CHLO** | **GEN** | **CIP** | **TZP** | **AMK** | **MER** | **Comments** |
| --- | --- | --- | --- | --- | --- | --- | --- | --- | --- | --- | --- | --- |
| Pair 1  (Ward J5) | Index | AMR-TZ-118 | *E. coli* | R | R | S | S | S | S | S | S | Same species but different strains |
| Caretaker | AMR-TZ-01CT | *E. coli* | R | R | R | R | S | S | S | S |
| Pair 2  (Ward J5) | Index | AMR-TZ-088 | *E. coli* | R | R | S | R | R | S | S | S | Same species but different strains |
| Caretaker | AMR-TZ-04CT | *E. coli* | R | R | S | S | S | S | S | S |
| Pair 3  (Ward J5) | Index | AMR-TZ-129 | *E. coli* | I | R | S | R | R | S | S | S | Different species |
| Caretaker | AMR-TZ-07CT | *K. pneumoniae* | S | R | S | R | R | S | S | S |
| Pair 4  (Ward J5) | Index | AMR-TZ-132 | *E. coli* | R | R | R | S | R | I | S | S | Different species |
| Caretaker | AMR-TZ-08CT | *K. pneumoniae* | S | R | R | R | R | R | S | S |
| Pair 5  (Ward J5) | Index | AMR-TZ-130 | *E. coli* | R | R | S | S | S | I | S | S | Same species but different strains |
| Caretaker | AMR-TZ-09CT | *E. coli* | R | R | S | S | S | S | S | S |
| Pair 6  (Ward J5) | Index | AMR-TZ-151 | *K. pneumoniae* | I | R | S | I | R | I | S | S | Different species |
| Caretaker | AMR-TZ-10CT | *E. coli* | R | R | S | R | R | S | S | S |
| Pair 7  (Ward J5) | Index | AMR-TZ-156 | *Enterobacter spp* | S | R | R | I | I | S | S | S | Different species |
| Caretaker | AMR-TZ-11CT | UGNB | R | R | R | R | R | S | S | R |
| Pair 8  (Ward J5) | Index | AMR-TZ-153 | UGNB | R | R | S | S | I | S | S | S | Different species |
| Caretaker | AMR-TZ-12CT | *E. coli* | R | R | S | S | R | S | S | R |
| Pair 9  (Ward J5) | Index | AMR-TZ-181 | UGNB | R | R | S | R | S | R | S | I | Different species |
| Caretaker | AMR-TZ-13CT | *K. pneumoniae* | R | R | S | S | I | S | S | S |
| Pair 10  (Ward J5) | Index | AMR-TZ-183 | UGNB | R | R | S | S | R | R | S | I | Different species |
| Caretaker | AMR-TZ-14CT | *K. pneumoniae* | S | R | R | S | R | S | S | S |
| Pair 11  (Ward E8) | Index | AMR-TZ-282 | *E. coli* | R | R | S | S | R | R | S | S | Different species |
| Caretaker | AMR-TZ-17CT | *K.pneumoniae* | S | R | S | S | S | S | S | S |

ESBL: Extended-spectrum beta-lactamases; TE: Tetracycline; TMP-SXT: Trimethoprim-sulfamethoxazole; CHLO: Chloramphenicol; GEN: Gentamicin; CIP: Ciprofloxacin; TZP: Piperacillin-tazobactam; MER: Meropenem; UGNB: Unidentified Gram Negative Bacteria; S: Sensitive; I: Intermediate: S: Sensitive
